# Supplementary material for: Structured Populations of Sulfolobus acidocaldarius with Susceptibility to Mobile Genetic Elements
Source: PubMed Central journal article supplement (PMC5554439; doi:10.1093/gbe/evx104), 2017-06-14
Supplement: evx104_SuppFig.pdf [file evx104_SuppFig.pdf]

A)

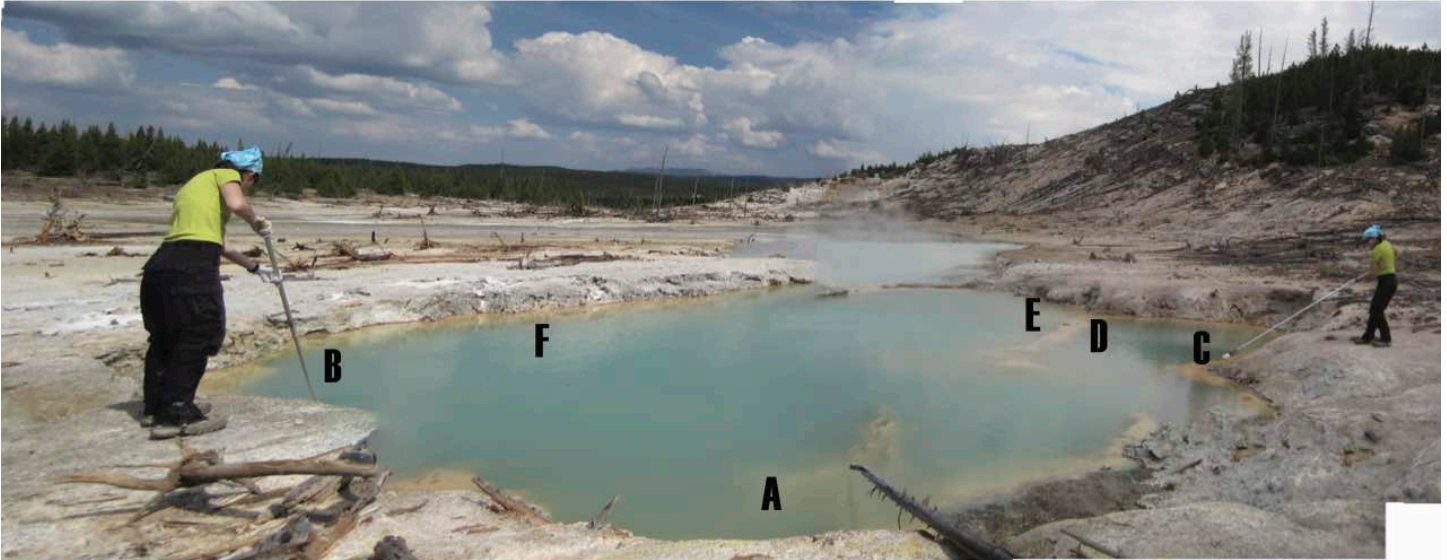

B)

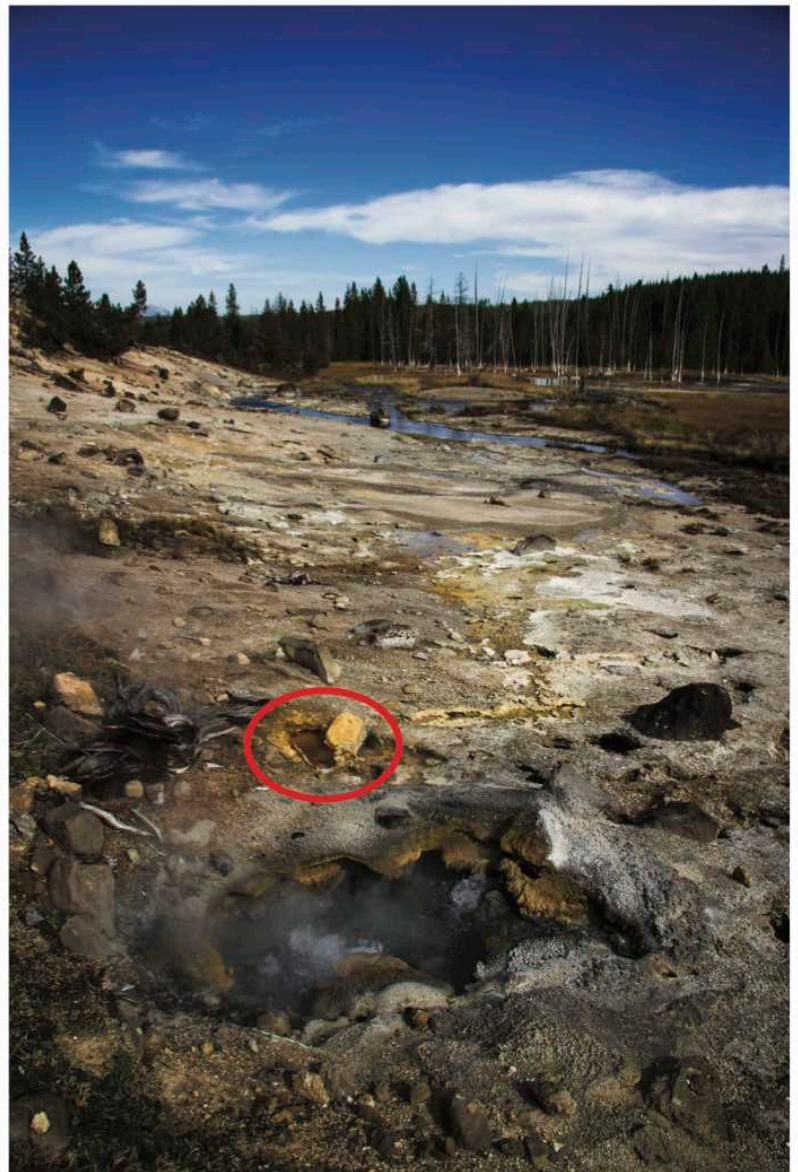

**Supplementary Figure 1.** Images of sampling sites. A) NG05 hot spring in the Norris Geyser Basin. Sampling sites A-F are labeled on the image. Samples for this study were taken at sites A and B. B) GG12 hot spring in the Norris Geyser Basin. GG12 is the small hot spring circled in red.

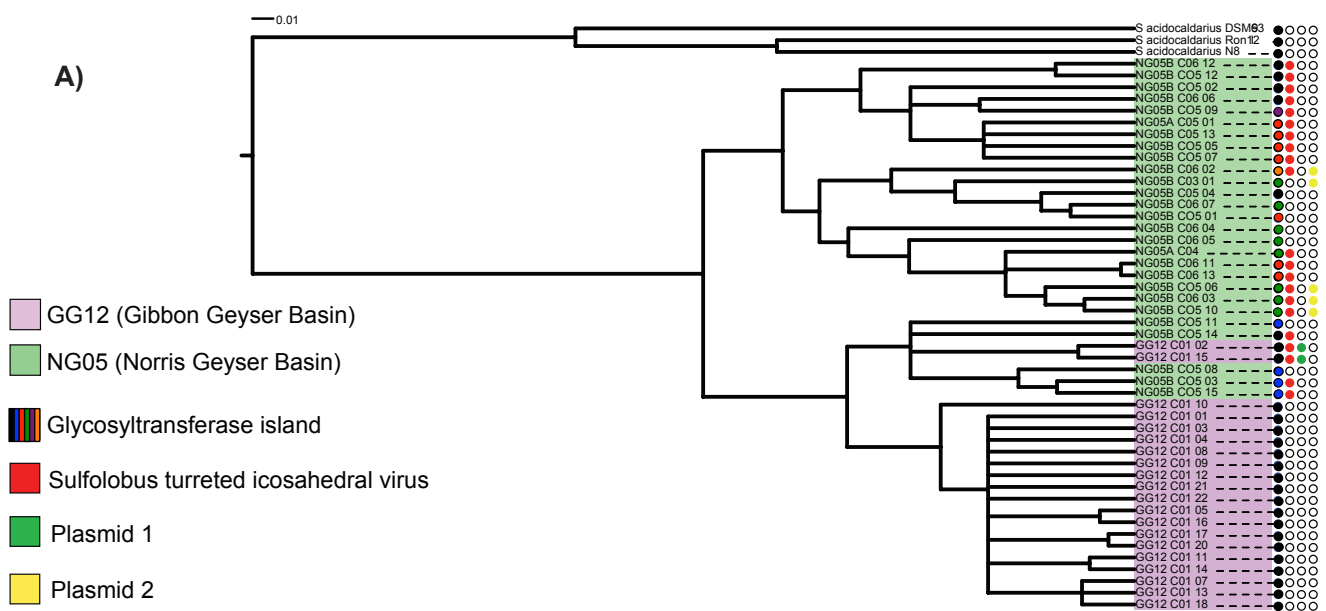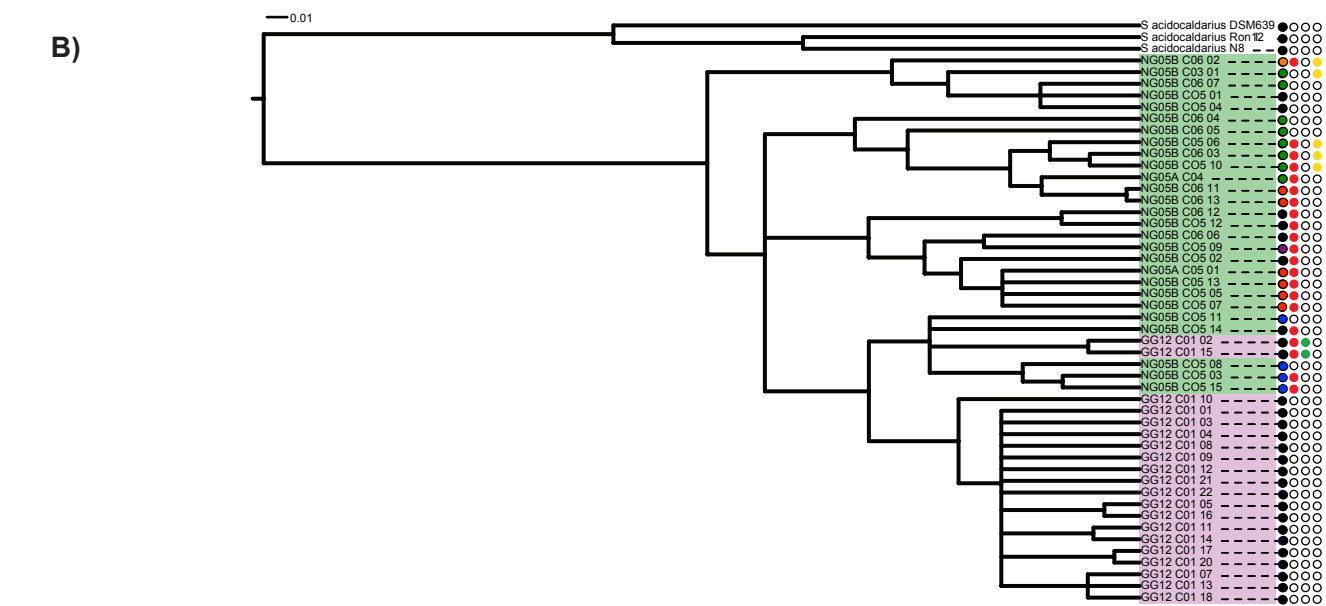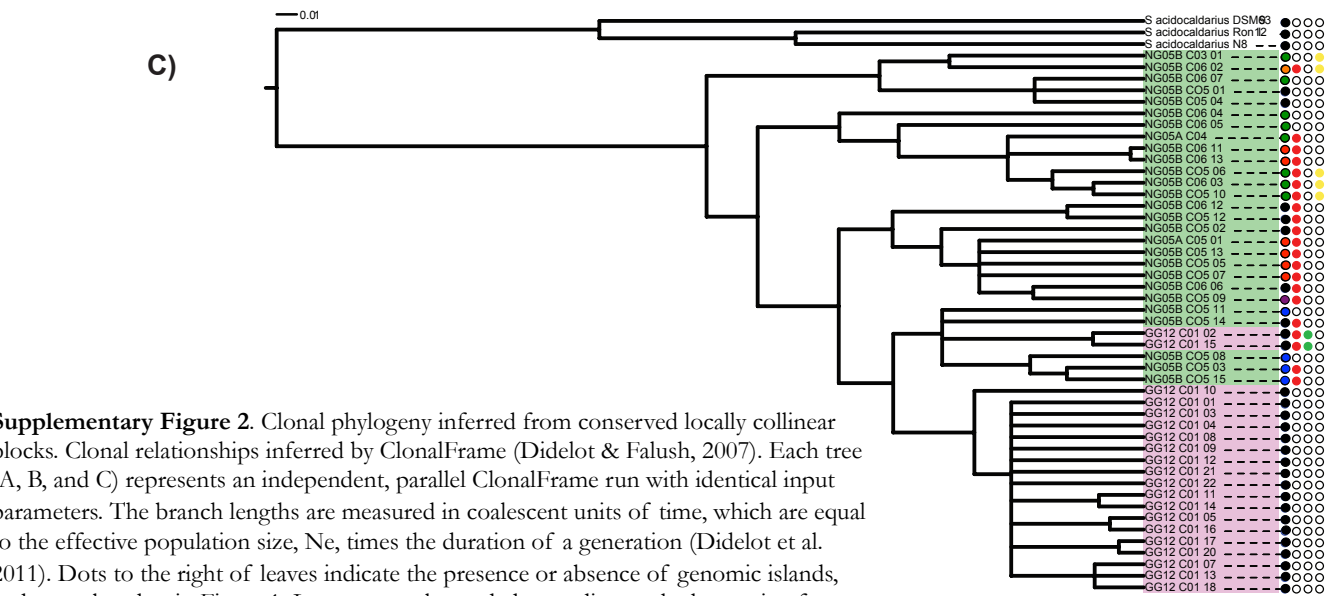

**Supplementary Figure 2.** Clonal phylogeny inferred from conserved locally collinear blocks. Clonal relationships inferred by ClonalFrame (Didelot & Falush, 2007). Each tree (A, B, and C) represents an independent, parallel ClonalFrame run with identical input parameters. The branch lengths are measured in coalescent units of time, which are equal to the effective population size,  $N_e$ , times the duration of a generation (Didelot et al. 2011). Dots to the right of leaves indicate the presence or absence of genomic islands, and are colored as in Figure 1. Leaves are color-coded according to the hot spring from which they were isolated. Trees were visualized using the Interactive Tree of Life (ITOL) program (itol.embl.de).

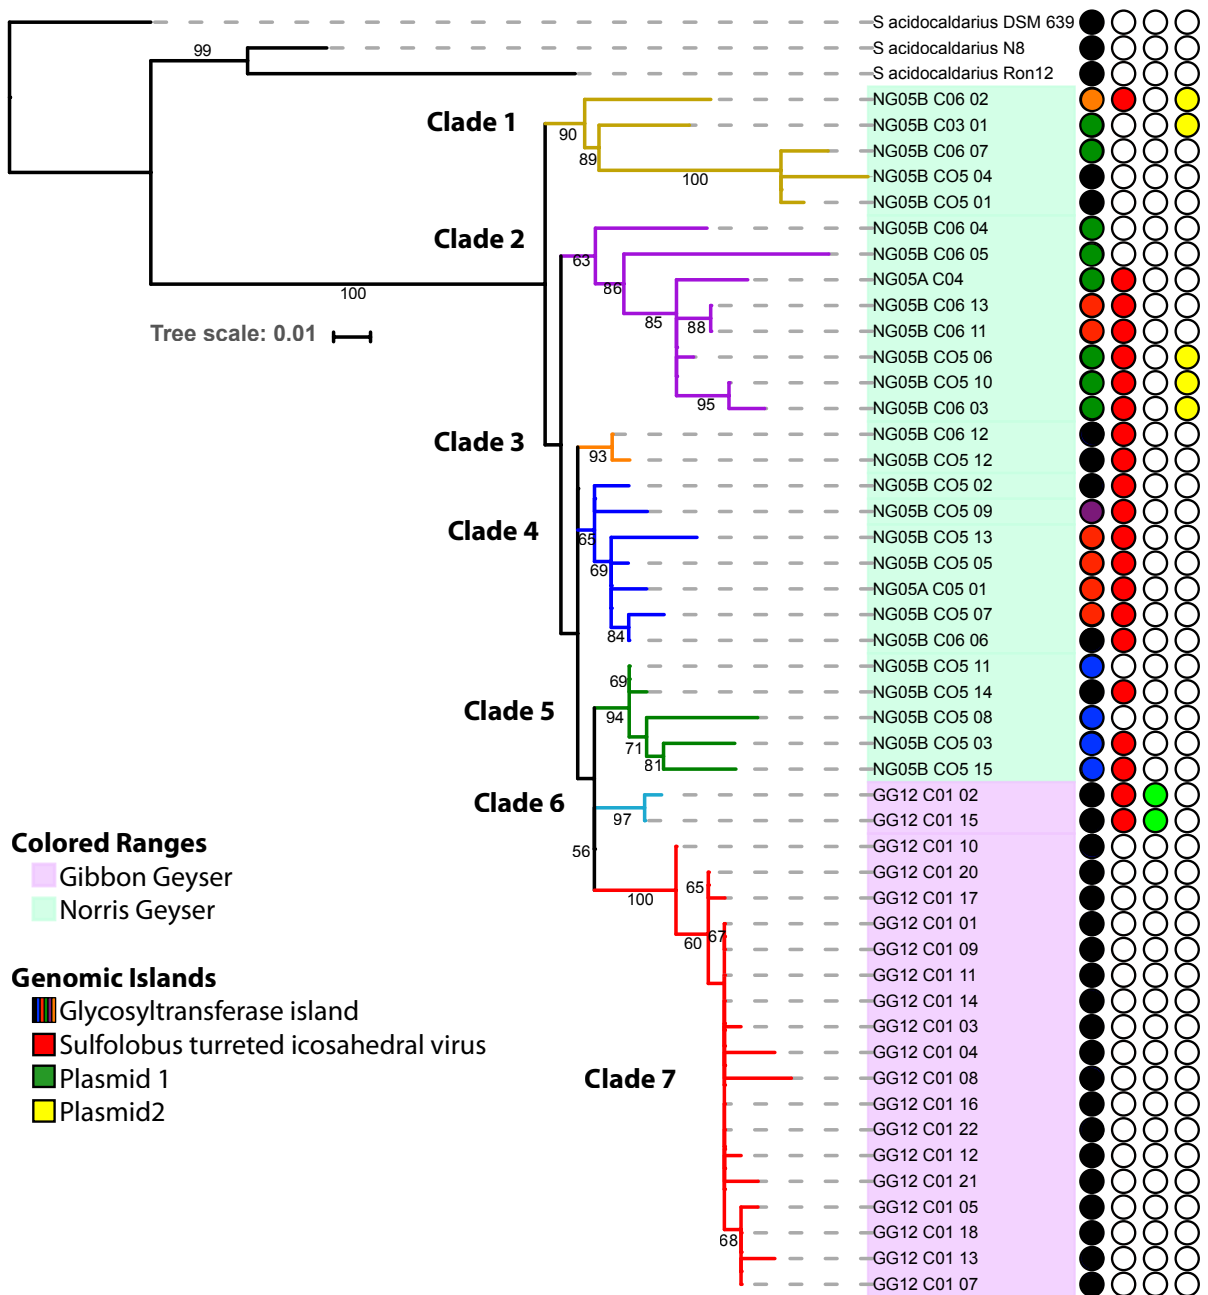

**Supplementary Figure 3.** Phylogenetic tree constructed by concatenating single nucleotide polymorphisms (SNPs) and insertions and deletions (indels) identified in the core genome relative to *S. acidocaldarius* DSM 639. The colored lines in the tree indicate each of the seven clades we identified among the *S. acidocaldarius* genomes isolated in 2012. Leaves are color-coded according to the hot spring from which they were isolated. Circles to the right of leaves indicate the presence or absence of specific genomic islands, and are colored as in Figure 1. Trees were visualized using the Interactive Tree of Life (ITOL) program ([itol.embl.de](http://itol.embl.de)).

**Supplementary Table 4.** Results from Tajima's Neutrality Test.

| Clade | M  | S  | $p_s$    | $\Theta$ | $\Pi$    | D         |
|-------|----|----|----------|----------|----------|-----------|
| 1     | 5  | 31 | 0.260504 | 0.125042 | 0.121008 | -0.241366 |
| 2     | 8  | 30 | 0.252101 | 0.097229 | 0.075030 | -1.210254 |
| 4     | 7  | 18 | 0.151261 | 0.061739 | 0.045618 | -1.458340 |
| 5     | 5  | 13 | 0.109244 | 0.052437 | 0.047059 | -0.744854 |
| 7     | 19 | 19 | 0.159664 | 0.045682 | 0.021131 | -2.058035 |

*A total of 189 positions were included in the final dataset. Evolutionary analyses were conducted in MEGA5. Abbreviations: m = number of sequences, S = number of segregating sites,  $p_s = S/m$ , theta =  $p_s / \sum_{i=1}^{n-1} 1/i$ ,  $\pi$  = nucleotide diversity, and D is the Tajima test statistic. Clades with fewer than 3 genomes were not included in the analysis.*

**Supplementary Table 5.** Single nucleotide polymorphisms (SNPs) that were fixed or polymorphic, synonymous or nonsynonymous within each clade.

| Clade 1        | D | P  | Genes with fixed nonsynonymous SNPs                        |
|----------------|---|----|------------------------------------------------------------|
| N              | 1 | 6  | Saci_0886                                                  |
| S              | 0 | 25 |                                                            |
| <b>Clade 2</b> |   |    |                                                            |
| D              |   |    | Genes with fixed nonsynonymous SNPs                        |
| N              | 0 | 13 |                                                            |
| S              | 0 | 17 |                                                            |
| <b>Clade 3</b> |   |    |                                                            |
| D              |   |    | Genes with fixed nonsynonymous SNPs                        |
| N              | 0 | 2  |                                                            |
| S              | 0 | 3  |                                                            |
| <b>Clade 4</b> |   |    |                                                            |
| D              |   |    | Genes with fixed nonsynonymous SNPs                        |
| N              | 0 | 9  |                                                            |
| S              | 0 | 9  |                                                            |
| <b>Clade 5</b> |   |    |                                                            |
| D              |   |    | Genes with fixed nonsynonymous SNPs                        |
| N              | 0 | 6  |                                                            |
| S              | 2 | 7  |                                                            |
| <b>Clade 6</b> |   |    |                                                            |
| D              |   |    | Genes with fixed nonsynonymous SNPs                        |
| N              | 3 | 1  | Saci_0872, Saci_0886, Saci_2317                            |
| S              | 0 | 0  |                                                            |
| <b>Clade 7</b> |   |    |                                                            |
| D              |   |    | Genes with fixed nonsynonymous SNPs                        |
| N              | 4 | 10 | Saci_0406, Saci_0886, Saci_1274, Saci_1299, Saci_1780/1781 |
| S              | 1 | 9  |                                                            |

Clades are labeled according to the clonal phylogeny shown in Figure 1. D: fixed in clade (present in all members of that clade and in no other strains); P: polymorphic in clade; N: nonsynonymous; S: synonymous. The fourth column lists the annotations relative to the reference strain (*S. acidocaldarius* DSM639) for the genes containing fixed nonsynonymous SNPs.

| Coords in GG12_C01_01- start | Coords in GG12_C01_01- end | Matching gene in <i>S. acidocaldarius</i> DSM639 | RAST Annotation                                                   | CDD annotation                                                      |
|------------------------------|----------------------------|--------------------------------------------------|-------------------------------------------------------------------|---------------------------------------------------------------------|
| 1604767                      | 1603454                    | Saci_1922                                        | glycosyltransferase (ec 2.4.1.-)                                  | Glycosyltransferase family 1 (cd/pfam/TIGR/COG)                     |
| 1604997                      | 1606148                    | Saci_1921                                        | glycosyltransferase                                               | Glycosyltransferase family 1 (cd/pfam/TIGR/COG)                     |
| 1608357                      | 1610798                    | Saci_1920                                        | membrane protein                                                  | Predicted membrane protein (pfam/COG)                               |
| 1613354                      | 1610904                    | Saci_1919                                        | membrane protein                                                  | Predicted membrane protein (pfam/COG)                               |
| 1614554                      | 1613895                    | Saci_1918                                        | methyltransferase, fkbm family domain protein                     | methyltransferase (TIGR)                                            |
| 1614798                      | 1617071                    | Saci_1917                                        | hypothetical protein                                              | No matches                                                          |
| 1617103                      | 1618425                    | Saci_1916                                        | cell envelope, surface polysaccharides and lipopolysaccharides    | Glycosyltransferase family 1 (cd/pfam/TIGR/COG)                     |
| 1618440                      | 1619396                    | Saci_1915                                        | glycosyltransferase involved in cell wall biogenesis (ec 2.4.-.-) | Glycosyltransferase family 2 (cd/pfam/COG)                          |
| 1620556                      | 1619489                    | Saci_1914                                        | glycosyltransferase (ec 2.4.1.-)                                  | Glycosyltransferase family 1 (cd/pfam/TIGR/COG)                     |
| 1620964                      | 1621101                    | Saci_1913                                        | hypothetical protein                                              | No matches                                                          |
| 1621176                      | 1623506                    | Saci_1912                                        | hypothetical protein                                              | No matches                                                          |
| 1624389                      | 1623604                    | Saci_1911                                        | hypothetical protein                                              | Glycosyltransferase family 2 (cd)                                   |
| 1624499                      | 1625491                    | Saci_1910                                        | hypothetical protein                                              | No matches                                                          |
| 1626228                      | 1625494                    | Saci_1909                                        | dolichyl-phosphate mannose synthase related protein               | Glycosyltransferase family 2 (cd/pfam/TIGR/COG)                     |
| 1627852                      | 1626326                    | Saci_1908                                        | hypothetical protein                                              | No matches                                                          |
| 1629061                      | 1628066                    | Saci_1907                                        | glycosyltransferase (ec 2.4.1.-)                                  | Glycosyltransferase family 1 (cd/pfam/TIGR/COG)                     |
| 1630166                      | 1632097                    | Saci_1906                                        | membrane protein                                                  | No matches                                                          |
| 1632767                      | 1634152                    | Saci_1905                                        | polysaccharide biosynthesis related protein                       | Wzx: exports metabolites across cell membranes/drug resistance (cd) |
| 1634435                      | 1635544                    | Saci_1904                                        | glycosyltransferase, group 1 family protein                       | Glycosyltransferase family 1 (cd/pfam/TIGR/COG)                     |
| 1636077                      | 1637204                    | Saci_1903                                        | conserved protein                                                 | No matches                                                          |
| 1637455                      | 1637847                    | Saci_1902                                        | COG1720: Uncharacterized conserved protein                        | COG1720: Uncharacterized conserved protein [Function unknown]       |
| 1637903                      | 1640950                    | Saci_1901                                        | hypothetical proteins                                             | No matches                                                          |
| 1641112                      | 1641759                    | Saci_1900                                        | 2-heptaprenyl-1,4-naphthoquinone methyltransferase (EC 2.1.1.163) | PRK05785: hypothetical protein; Provisional                         |

**Supplementary Table 6.** Coordinates of ORFs identified in the glycosyltransferase-enriched genomic island in GG12\_C01\_01 using the RAST pipeline, as well as the corresponding gene in *S. acidocaldarius* DSM639 based on ORF clustering. Last two columns show annotations based on the RAST pipeline and RPSBLAST to the Conserved Domains Database.

| Clade | Deletion Letter | Genome                   | Coords at which coverage drops below 10x | Coords at which coverage rises above 10x |
|-------|-----------------|--------------------------|------------------------------------------|------------------------------------------|
| 1     | D               | NG05B_C03_01             | 1611124                                  | 1645967                                  |
| 1     | A               | NG05B_C05_04             | full coverage                            | full coverage                            |
| 1     | F               | NG05B_C06_02             | 1615794                                  | 1634891                                  |
| 1     | D               | NG05B_C06_07             | 1611126                                  | 1645972                                  |
| 1     | A               | NG05B_CO5_01             | full coverage                            | full coverage                            |
| 2     | D               | NG05A_C04                | 1611125                                  | 1645972                                  |
| 2     | D               | NG05B_C06_03             | 1611132                                  | 1645970                                  |
| 2     | D               | NG05B_C06_04             | 1611134                                  | 1645967                                  |
| 2     | D               | NG05B_C06_05             | 1611132                                  | 1645970                                  |
| 2     | C               | NG05B_C06_11             | 1614818                                  | 1637395                                  |
| 2     | C               | NG05B_C06_13             | 1614830                                  | 1637393                                  |
| 2     | D               | NG05B_CO5_06             | 1611125                                  | 1645970                                  |
| 2     | D               | NG05B_CO5_10             | 1611128                                  | 1645974                                  |
| 3     | A               | NG05B_C06_12             | full coverage                            | full coverage                            |
| 3     | A               | NG05B_CO5_12             | full coverage                            | full coverage                            |
| 4     | C               | NG05A_C05_01             | 1614819                                  | 1637393                                  |
| 4     | A               | NG05B_C06_06             | full coverage                            | full coverage                            |
| 4     | A               | NG05B_CO5_02             | full coverage                            | full coverage                            |
| 4     | C               | NG05B_CO5_05             | 1614828                                  | 1637393                                  |
| 4     | C               | NG05B_CO5_07             | 1614828                                  | 1637393                                  |
| 4     | E               | NG05B_CO5_09             | 1605295                                  | 1635634                                  |
| 4     | C               | NG05B_CO5_13             | 1614825                                  | 1637392                                  |
| 5     | B               | NG05B_CO5_03             | 1603770                                  | 1645021                                  |
| 5     | B               | NG05B_CO5_08             | 1603771                                  | 1645021                                  |
| 5     | B               | NG05B_CO5_11             | 1603771                                  | 1645022                                  |
| 5     | A               | NG05B_CO5_14             | full coverage                            | full coverage                            |
| 5     | B               | NG05B_CO5_15             | 1603771                                  | 1645021                                  |
| 6     | A               | GG12_C01_02              | full coverage                            | full coverage                            |
| 6     | A               | GG12_C01_15              | full coverage                            | full coverage                            |
| 7     | A               | GG12_C01_01              | full coverage                            | full coverage                            |
| 7     | A               | GG12_C01_03              | full coverage                            | full coverage                            |
| 7     | A               | GG12_C01_04              | full coverage                            | full coverage                            |
| 7     | A               | GG12_C01_05              | full coverage                            | full coverage                            |
| 7     | A               | GG12_C01_07              | full coverage                            | full coverage                            |
| 7     | A               | GG12_C01_08              | full coverage                            | full coverage                            |
| 7     | A               | GG12_C01_09              | full coverage                            | full coverage                            |
| 7     | A               | GG12_C01_10              | full coverage                            | full coverage                            |
| 7     | A               | GG12_C01_11              | full coverage                            | full coverage                            |
| 7     | A               | GG12_C01_12              | full coverage                            | full coverage                            |
| 7     | A               | GG12_C01_13              | full coverage                            | full coverage                            |
| 7     | A               | GG12_C01_14              | full coverage                            | full coverage                            |
| 7     | A               | GG12_C01_16              | full coverage                            | full coverage                            |
| 7     | A               | GG12_C01_17              | full coverage                            | full coverage                            |
| 7     | A               | GG12_C01_18              | full coverage                            | full coverage                            |
| 7     | A               | GG12_C01_20              | full coverage                            | full coverage                            |
| 7     | A               | GG12_C01_21              | full coverage                            | full coverage                            |
| 7     | A               | GG12_C01_22              | full coverage                            | full coverage                            |
| ref   | A               | S_acidocaldarius_DSM639  | full coverage                            | full coverage                            |
| ref   | A               | S_acidocaldarius_N8      | full coverage                            | full coverage                            |
| ref   | A               | S_acidocaldarius_Ron12_I | full coverage                            | full coverage                            |

**Supplementary Table 7.** Variation in the glycosyltransferase-enriched genomic island. Reads from each genome were mapped to a reference genomic island from GG12\_C01\_01. We identified six different patterns of variation in the genomic island; these are highlighted in different colors and given a letter designation in the second column. Fourth column shows coordinates relative to GG12\_C01\_01 for regions where coverage drops below 10x; fifth column shows coordinates where coverage rises above 10x. Coordinates and genes in the island are shown in Supplementary Table 6.

| Annotation           | ORF designation, STIV1 | ORF designation, STIV2 | Sequence length in <i>S. acidocaldarius</i> STIV (bp) | Sequence length in STIV1 (bp) | Sequence length in STIV2 (bp) | Coordinates in <i>S. acidocaldarius</i> STIV | Coordinates in STIV1 | Coordinates in STIV2 | % Identity with STIV1 | % Identity with STIV2                                 |
|----------------------|------------------------|------------------------|-------------------------------------------------------|-------------------------------|-------------------------------|----------------------------------------------|----------------------|----------------------|-----------------------|-------------------------------------------------------|
| Pyramid protein      | C92                    | Not present            | 279                                                   | 279                           | Not present                   | 2,931-3,209                                  | 3,888-4,166          | Not present          | 88.5                  | Not present                                           |
| Integrase            | A510                   | A510                   | 1533                                                  | 1533                          | 1,530                         | 3,403-4935                                   | 2,155-3,684          | 2,167-3,699          | 74.9                  | 74.4                                                  |
| Major coat protein   | B345                   | A345                   | 1,038                                                 | 1,038                         | 1,038                         | 8,839-9,876                                  | 14,942-15,979        | 14,038-15,075        | 81.6                  | 72.7                                                  |
| Transcription factor | B116                   | B116                   | 354                                                   | 351                           | 351                           | 15,711-16,064                                | 7,994-8,344          | 8,165-8,515          | 71.7                  | 60.2                                                  |
| Turret protein       | A223                   | B631                   | 678                                                   | 672                           | 1,895                         | 1,153-1,830                                  | 5,260-5,931          | 5,291-7,186          | 82.3                  | 66bp in N-terminus match with 89.4%                   |
| Glycosyltransferase  | A197                   | B197                   | 594                                                   | 594                           | 593                           | 1,869-2,462                                  | 4,624-5,217          | 4652-5245            | 80.9                  | 74.5                                                  |
| Turret protein       | C557                   | C510                   | 1,644                                                 | 1,674                         | 1,533                         | 7,184-8,227                                  | 15,990-17,663        | 15,090-16,622        | 36.0                  | 49.8                                                  |
| Hypothetical protein | C121                   | C96                    | 270                                                   | 366                           | 290                           | 12,914-12,645                                | 11,616-11,981        | 11,139-11,429        | 79.5                  | 95.5 % at the N-terminus and 78.6 % at the C-terminus |
| Turret protein       | C381                   | Not present            | 1,155                                                 | 1,146                         | Not present                   | 1-1,155                                      | 5,931-7,076          | Not present          | 79.1                  | Not present                                           |



|                |      |      |     |     |     |               |               |               |      |      |
|----------------|------|------|-----|-----|-----|---------------|---------------|---------------|------|------|
| ATPase         | B164 | B204 | 615 | 495 | 614 | 10,274-10,888 | 13,958-14,452 | 13,157-13,771 | 78.1 | 77.6 |
| Virion protein | B130 | C141 | 426 | 393 | 425 | 5,990-6,415   | 797-1,189     | 792-1217      | 71.9 | 71.8 |
| Virion protein | A55  | A55  | 168 | 168 | 167 | 5,808-5,975   | 1,201-1,368   | 1,222-1,389   | 80.0 | 59.0 |

**Supplementary Table 8.** Summary of predicted open reading frames in the *Sulfolobus* turreted icosahedral virus (STIV) integrated in *S. acidocaldarius*, and comparisons with open reading frames in previously sequenced STIV genomes.

| <b>Genome Name</b>              | <b>NCBI Accession</b> | <b>Coords1</b> | <b>Coords2</b> | <b>Comments</b>                                 | <b>CRISPR locus</b> |
|---------------------------------|-----------------------|----------------|----------------|-------------------------------------------------|---------------------|
| S. islandicus M.14.25           | NC_012588             | 550085         | 550061         | dTDP-4-dehydrorhamnose reductase                | CRISPR 3 spacer 27  |
| S. islandicus M.14.25           | NC_012588             | 912187         | 912224         | hypothetical protein                            | CRISPR 3 spacer 75  |
| S. islandicus L.S.2.15          | NC_012589             | 1576643        | 1576609        | hypothetical protein                            | CRISPR 3 spacer 75  |
| S. islandicus L.S.2.15          | NC_012589             | 1576660        | 1576696        | hypothetical protein                            | CRISPR 4 spacer 5   |
| S. islandicus Y.G.57.14         | NC_012622             | 1504835        | 1504857        | hypothetical protein, close to plasmid genes    | CRISPR 4 spacer 7   |
| S. islandicus Y.G.57.14         | NC_012622             | 1484143        | 1484170        | close to TraD and other plasmid genes           | CRISPR 4 spacer 12  |
| S. islandicus Y.G.57.14         | NC_012622             | 1485554        | 1485587        | close to TraD and other plasmid genes           | CRISPR 4 spacer 77  |
| S. islandicus Y.N.15.51         | NC_012623             | 1843072        | 1843045        | ABC transporter                                 | CRISPR 3 spacer 25  |
| S. islandicus Y.N.15.51         | NC_012623             | 788977         | 788955         | hypothetical protein, close to plasmid genes    | CRISPR 4 spacer 7   |
| S. islandicus Y.N.15.51 plasmid | NC_012624             | 34222          | 34205          | Located on a plasmid chromosome                 | CRISPR 4 spacer 7   |
| S. islandicus Y.N.15.51 plasmid | NC_012624             | 12410          | 12390          | Located on a plasmid chromosome                 | CRISPR 4 spacer 7   |
| S. islandicus Y.N.15.51 plasmid | NC_012624             | 40190          | 40208          | Located on a plasmid chromosome                 | CRISPR 4 spacer 7   |
| S. islandicus Y.N.15.51 plasmid | NC_012624             | 24657          | 24690          | Located on a plasmid chromosome                 | CRISPR 4 spacer 77  |
| S. islandicus L.D.8.5 plasmid   | NC_013770             | 10444          | 10427          | Located on a plasmid chromosome                 | CRISPR 4 spacer 7   |
| S. islandicus L.D.8.5 plasmid   | NC_013770             | 12929          | 12912          | Located on a plasmid chromosome                 | CRISPR 4 spacer 7   |
| S. islandicus L.D.8.5 plasmid   | NC_013770             | 20497          | 20479          | Located on a plasmid chromosome                 | CRISPR 4 spacer 7   |
| S. islandicus L.D.8.5 plasmid   | NC_013770             | 946            | 978            | Located on a plasmid chromosome                 | CRISPR 4 spacer 77  |
| S. islandicus L.D.8.5 plasmid   | NC_013770             | 20084          | 20060          | Located on a plasmid chromosome                 | CRISPR 4 spacer 81  |
| S. islandicus M.16.27           | NC_012632             | 573664         | 573640         | dTDP-4-dehydrorhamnose reductase                | CRISPR 3 spacer 27  |
| S. islandicus M.16.27           | NC_012632             | 1479971        | 1480008        | hypothetical protein, close to plasmid genes    | CRISPR 3 spacer 75  |
| S. islandicus M.16.27           | NC_012632             | 1463479        | 1463447        | hypothetical protein, close to plasmid genes    | CRISPR 3 spacer 76  |
| S. islandicus REY15A            | NC_012726             | 572924         | 572900         | dTDP-4-dehydrorhamnose reductase [Cell envelope | CRISPR 3 spacer 27  |

|                                        |           |         |         |                                                       |                        |
|----------------------------------------|-----------|---------|---------|-------------------------------------------------------|------------------------|
|                                        |           |         |         | biogenesis, outer membrane];<br>Region: RfbD; COG1091 |                        |
| S. islandicus<br>L.D.8.5               | NC_013769 | 1369968 | 1369933 | ATPase AAA                                            | CRISPR 3<br>spacer 8   |
| S. islandicus<br>L.D.8.5               | NC_013769 | 1591678 | 1591644 | hypothetical protein                                  | CRISPR 3<br>spacer 75  |
| S. islandicus<br>L.D.8.5               | NC_013769 | 1591695 | 1591731 | hypothetical protein                                  | CRISPR 4<br>spacer 5   |
| S. islandicus<br>L.D.8.5               | NC_013769 | 1376911 | 1376933 | hypothetical protein, close to<br>plasmid genes       | CRISPR 4<br>spacer 7   |
| S. islandicus<br>L.D.8.5               | NC_013769 | 1343520 | 1343541 | hypothetical protein, close to<br>plasmid genes       | CRISPR 4<br>spacer 7   |
| S. islandicus<br>L.D.8.5               | NC_013769 | 1872713 | 1872692 | hypothetical protein, close to<br>plasmid genes       | CRISPR 4<br>spacer 7   |
| S. islandicus<br>L.D.8.5               | NC_013769 | 1340990 | 1341022 | hypothetical protein, close to<br>plasmid genes       | CRISPR 4<br>spacer 77  |
| S. islandicus<br>L.D.8.5               | NC_013769 | 1880391 | 1880367 | hypothetical protein, close to<br>plasmid genes       | CRISPR 4<br>spacer 81  |
| S. islandicus<br>HVE10.4               | NC_017275 | 402805  | 402781  | dTDP-6-deoxy-L-lyxo-4-<br>hexulose reductase and      | CRISPR 3<br>spacer 27  |
| S. islandicus<br>HVE10.4               | NC_017275 | 1798731 | 1798768 | hypothetical protein, close to<br>many IS elements    | CRISPR 3<br>spacer 75  |
| S. islandicus<br>HVE10.4               | NC_017275 | 724373  | 724354  | intergenic, near toxin/antitoxin<br>region            | CRISPR 4<br>spacer 5   |
| S. islandicus<br>HVE10.4               | NC_017275 | 1531070 | 1531034 | hypothetical protein, close to<br>plasmid genes       | CRISPR 4<br>spacer 5   |
| S.<br>islandicusRE<br>Y15A             | NC_017276 | 772183  | 772146  | hypothetical protein - close to<br>many IS elements   | CRISPR 3<br>spacer 75  |
| S.<br>islandicusRE<br>Y15A             | NC_017276 | 1662559 | 1662596 | intergenic region                                     | CRISPR 3<br>spacer 75  |
| S.<br>islandicusRE<br>Y15A             | NC_017276 | 2486773 | 2486795 | transposase/IS element                                | CRISPR 4<br>spacer 94  |
| S. islandicus<br>rod-shaped<br>virus 2 | NC_004086 | 21734   | 21770   | Located on a viral genome                             | CRISPR 4<br>spacer 117 |
| S. islandicus<br>rod-shaped<br>virus 1 | NC_004087 | 18268   | 18302   | Located on a viral genome                             | CRISPR 4<br>spacer 117 |

**Supplementary Table 9.** Matches between CRISPR spacers in *S. acidocaldarius* and *S. islandicus* genomes and *Sulfolobus* viral genomes. All matches had an *e* value of 0.001 or lower.
